# Supplementary material
Source: PubMed Central journal article supplement (PMC3966621)
Supplement: NIHMS560510-supplement-01.pdf [file NIHMS560510-supplement-01.pdf]

**Figure S1, related to Experimental Procedures and Fig. 1.** Genetic organization of the PTM and PTN biosynthetic clusters in *S. platensis* MA7327 and MA7339 and the FASII loci in *S. platensis* MA7327 and *S. albus* J1074. (A) Genetic organization of the PTM and PTN biosynthetic cluster in *S. platensis* MA7327 and MA7339. Four self-resistance candidates are shaded in light blue and are conserved in both *ptm* and *ptn* clusters. Functional annotations of the four genes are summarized in Table S1. (B) Genetic organization of the FASII loci in *S. platensis* MA7327 and *S. albus* J1074. The *fabH* and *fabF* genes were amplified and sequenced using primers based on homologous regions within the *fab* operons of *S. coelicolor*, *S. avermitilis*, and *S. griseus* (Table S4). Primers are depicted as small black arrows. The ORF downstream of *fabF* is a putative gene encoding a protein homologous to 3-hydroxyisobutyrate dehydrogenases from *Streptomyces* spp.

**A**

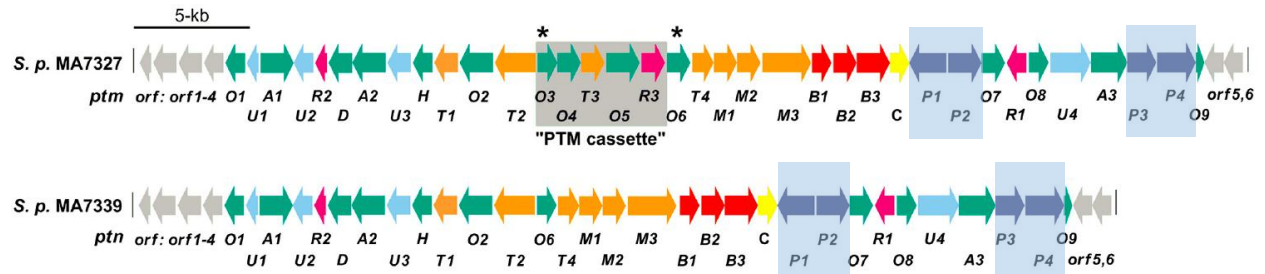

**B**

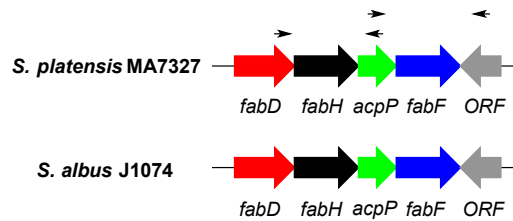

**Fig. S2, related to Experimental Procedures and Fig. S2B.** Protein sequence alignment of *Streptomyces* spp. and *E. coli* FabF and *Streptomyces platensis* MA7327 and MA7339 PtmP3. The conserved catalytic triad of Cys162, His300, and His334 are identified with red asterisks. Conserved residues throughout all protein sequences are shown in red text with yellow highlight; conserved residues to the consensus sequence are shown in blue text with cyan highlight; similar residues to the consensus sequence are shown in blue text with no highlight.

|                                  |                                                      |     |
|----------------------------------|------------------------------------------------------|-----|
| Consensus                        | VSATNRTVVVTGIGATTEPLGGDAASTWEGLLAGRSGVRPLXQEWAAADLPV |     |
| <i>S. platensis</i> MA7327 PtmP3 | -MADNGQVLVTGIGAMTEVGDASSSSWSGLLAGKSGVRAIVEEWAADLPV   | 49  |
| <i>S. platensis</i> MA7339 PtmP3 | -MAENGGQVLVTGIGAMTEVGDASSSSWSGLLAGKSGVRAIVEEWAADLPV  | 49  |
| <i>S. platensis</i> MA7327 FabF  | VNATNRTVVVTGIGATTEPLGGDSASSWEAMLAGRSGVGTLDQDWAALPVE  | 50  |
| <i>S. albus</i> J1074 FabF       | VSPNTNRTVVVTGIGATTEPLGGDAASTWEGLIAGRSGVRPLDDERYADLPV | 50  |
| <i>S. avermitilis</i> FabF       | VSPNTNRTVVVTGIGATTEPLGGDVASTWEGLVAGRSGVRPLEQEWAEEQAV | 50  |
| <i>S. coelicolor</i> FabF        | VSSNTNRTVVVTGIGATTEPLGGDAASTWEGLVAGRSGVRPLEQEWAADQAV | 50  |
| <i>S. griseus</i> FabF           | VNSTNRTVVVTGIGATTEPLGGDSASTWEGLMAGRSGVRFLEGERFAELPVE | 50  |
| <i>E. coli</i> FabF              | --MSKFRVVVTGLGMLSEVGNVSESTWKALLAGQSGISLIDHFDTSAYAT   | 48  |
|                                  |                                                      |     |
| Consensus                        | RIAAQAAVDPAAE-VLPRPQARKLDRSAQFALIAAREAWADAGXTXXAGED  |     |
| <i>S. platensis</i> MA7327 PtmP3 | SLAAGLTEDPAA-ALPRTQARKLDRGEQLAMLSREAWQDAG-----A      | 91  |
| <i>S. platensis</i> MA7339 PtmP3 | GIAAGLTEDPAA-ALPRTQARKLDRGEQLAMLSREAWQDAG-----A      | 91  |
| <i>S. platensis</i> MA7327 FabF  | RIAAQAAVDPAD-VLPRPQARKLDRSAQFALIAAREAWADAGFTARAGED   | 99  |
| <i>S. albus</i> J1074 FabF       | RIAAQIAVEPAE-VLPRFLVRKLDLSAQFALIAAREAWADAGYTAMAGED   | 99  |
| <i>S. avermitilis</i> FabF       | RIAAQIAVEPGE-VIPRPQARRLDRSAQFALIAAKEAWADAGFTDKAGAD   | 99  |
| <i>S. coelicolor</i> FabF        | RIAAQAAVDPSE-VIPRPQARRLDRSAQFALIAAQEAWKADAGYAGKAGES  | 99  |
| <i>S. griseus</i> FabF           | RIAAQAAVDPGD-VLPRFLARKLDRSAQFALIAAREAWADAGFTAKAGED   | 99  |
| <i>E. coli</i> FabF              | KFAGLVKDFNCEDIISRKEQRKMDAFIQYGIVAGVQAMQDSC-----LEI   | 93  |
|                                  |                                                      |     |
| Consensus                        | PEVD-----PERLGAVIASGIGGVTTLLDQYDVLKEKGVRRVSPHTVPM    |     |
| <i>S. platensis</i> MA7327 PtmP3 | PEVE-----PERLAVVIGTGTGGVLTTLGQDDLFEESGARRLSFFAVPMP   | 135 |
| <i>S. platensis</i> MA7339 PtmP3 | PEVE-----PERLAVVIGTGTGGVLTTLGQDDLFEESGARRLSFFAVPMP   | 135 |
| <i>S. platensis</i> MA7327 FabF  | TSVD-----PDRLGAVIASGIGGVTTLLGQYDVLKEKGVRRVSPHTVPM    | 143 |
| <i>S. albus</i> J1074 FabF       | EQIS-----PERLGTVIASGIGGVTTLLDQYDVLKEKGVRRVSPHTVPM    | 143 |
| <i>S. avermitilis</i> FabF       | PAVD-----PDRLGTVIASGIGGVTTLLDQYDVLKEKGVRRVSPHTVPM    | 143 |
| <i>S. coelicolor</i> FabF        | PAEDGAAHVDPDRLGAVIASGIGGVTTLLDQYDVLKEKGVRRVSPHTVPM   | 149 |
| <i>S. griseus</i> FabF           | ESVA-----PERLGSVIASGIGGVTTLLDQYDVLKEKGVRRVSPHTVPM    | 143 |
| <i>E. coli</i> FabF              | TEEN-----ATRIGAAIGSGIGGLGLIEENHTSLMNGSPRKISFFVPS     | 137 |
|                                  |                                                      |     |
| *                                |                                                      |     |
| Consensus                        | LMPNGFPXANVGLDVGARAGVHTPVSACASGAEAIGYAIEMIRTGRADV    |     |
| <i>S. platensis</i> MA7327 PtmP3 | LMPNGFPAAWVSMDLGAKGGARTPVSACASGAEALAMGLDLLRAGRVDVVV  | 185 |
| <i>S. platensis</i> MA7339 PtmP3 | LMPNGFPAAWVSMDLGAKGGARTPVSACASGAEALAMGLDLLRAGRVDVVV  | 185 |
| <i>S. platensis</i> MA7327 FabF  | LMPNGFSANVGLDVNARAGVHTPVSACASGSEAIGYAIEMIRTGRADFVI   | 193 |
| <i>S. albus</i> J1074 FabF       | LMPNSESANVGLVNVNARAGVHTPVSACASGAEAIGYAVEMIRTGRADV    | 193 |
| <i>S. avermitilis</i> FabF       | LMPNGFSANVGLAVGARAGVHTPVSACASGAEAIGYAIEMIRTGRADV     | 193 |
| <i>S. coelicolor</i> FabF        | LMPNGFSANVGLAVGARAGVHTPVSACASGAEAIGYAIEMIRTGRADV     | 199 |
| <i>S. griseus</i> FabF           | LMPNGFPAANVGLVNAQAGVHTPVSACASGAEAIGYAVEMIRTGRADV     | 193 |
| <i>E. coli</i> FabF              | TIVNMVAGHLTIMYGLRGPSSISIATACTSGVHNIGHAARIYAGDADVMV   | 187 |
|                                  |                                                      |     |
| Consensus                        | AGGTEAAIHPLPIAAFNMAMSKNNDXPXGASRPFDTARDGFVLGEGAG     |     |
| <i>S. platensis</i> MA7327 PtmP3 | AGGVEACLHPFTIAAFQMKALSTQCENPEAVSRPFDVARSGFVMGEGAG    | 235 |
| <i>S. platensis</i> MA7339 PtmP3 | AGGVEACLHPFTIAAFQMKALSTQCENPEAVSRPFDVARSGFVMGEGAG    | 235 |
| <i>S. platensis</i> MA7327 FabF  | AGGTEAAIHPLPIAAFNMAMSKNNDPQGASRPFDTARNGFVMGEGAG      | 243 |
| <i>S. albus</i> J1074 FabF       | AGGTEAAIHPLPVVAFANMMAMSKNNDPEKASRPYDTGRDGFVLGEGAG    | 243 |
| <i>S. avermitilis</i> FabF       | AGGTEAAIHPLPIAAFNMAMSKNNDPQGASRPYDVARDGFVLGEGAG      | 243 |
| <i>S. coelicolor</i> FabF        | AGGTEAAIHPLPIAAFNMAMSKNNDPQGASRPFDTARDGFVLGEGAG      | 249 |
| <i>S. griseus</i> FabF           | AGGTEAAIHPLPIAAFANMMAMSKNEEPETASRPYDTGRDGFVLGEGAG    | 243 |
| <i>E. coli</i> FabF              | AGGAEKASTPLGVGGFGAARALSTRNDNPQAASRPWDKERDGFVLGDGAG   | 237 |

**Fig. S2 continued.**

|                           |                                                      |     |
|---------------------------|------------------------------------------------------|-----|
| Consensus                 | VXVLESAEHAAARGARVYAEXVGGISADXHHIXQPEPEGRGIAHALQNL    |     |
| S. platensis MA7327 PtmP3 | IMVLERAEFARARGAKTYGTLASAVSSSNHITASDAEG--QVHAIELA     | 283 |
| S. platensis MA7339 PtnP3 | IMVLERAGFARARGATTYGTLAGSAVSSSNHITASDAAG--QVHAIELA    | 283 |
| S. platensis MA7327 FabF  | VIVLESAEHAARKRGARVYAEAVGQGISADSHDVVQPEPESGNGIAHALQDL | 293 |
| S. albus J1074 FabF       | VVVLESAEHAAARGASVYCEVLGQQLSADSHHIAQPEPTCRGIAAALQHL   | 293 |
| S. avermitilis FabF       | VIVLESAEHAARKRGARVYAEAVGQGISADSHDIVQPEPEGRGISHALQNL  | 293 |
| S. coelicolor FabF        | VLVLESAEHAAARGARVYAEAVGQGISADSHDIVQPEPEGRGISAALQNL   | 299 |
| S. griseus FabF           | VVVLESAEHAAARGARVYCEVLGQQLSADAHHIAQPEPESGRGIAAAMQNL  | 293 |
| E. coli FabF              | MLVLEEYEHAKKRGAKIYAEVLVGFMSSDAYHMTSPENGAALAMANA      | 287 |

\*

|                           |                                                      |     |
|---------------------------|------------------------------------------------------|-----|
| Consensus                 | LDDADLXPXEIVHVNAHATSTPQGDLAEXKALRKVXGDDXDHVAVSATKS   |     |
| S. platensis MA7327 PtmP3 | LRDADLTQQDIGHVHAHATSTESGDLAEAEALGRAVCG---THASVTATKS  | 330 |
| S. platensis MA7339 PtnP3 | LRDADLTQRDIGHVHAHATSTESGDLAEAEALGRAVCG---THASVTATKS  | 330 |
| S. platensis MA7327 FabF  | LDSNDLDPAEIVHVNAHATSTPQGDIAELKALRKVFGDDTDHMAVSATKS   | 343 |
| S. albus J1074 FabF       | MDDTDLKPSEVVHLNAHATSTPQGDIAEVLKALRQILGEDLEHVVAISATKS | 343 |
| S. avermitilis FabF       | LDSTDLNPAEIVHVNAHATSTPAGDVAELKALRKVFGDDADHFVAVSATKS  | 343 |
| S. coelicolor FabF        | LDGNDLDPAEIVHVNAHATSTPAGDIAELKALRKVFGDDVDHMAVSGTKS   | 349 |
| S. griseus FabF           | LDSSDLKPSEVVHLNAHATSTPQGDIAEIKALRKVFGDDLHDHVAISATKS  | 343 |
| E. coli FabF              | LRDAGIEASQIGYVNAHGTSTPAGDKAEAQAVKTIIFGEAASRVLVSSATKS | 337 |

\*

|                           |                                                       |     |
|---------------------------|-------------------------------------------------------|-----|
| Consensus                 | MTGHLLGGAGGVEXVAXVLALXHRVAPPTINVDELDPEDID---ADIVRGE   |     |
| S. platensis MA7327 PtmP3 | MTGHMLGASGAVGALAALLALKDGVAPAIRNLDDELDPEDID---LDVVQGE  | 377 |
| S. platensis MA7339 PtnP3 | MTGHMLGASGAVGAMAALLALKDGVAPAIRNLDDELDPEDID---LDVVQGE  | 377 |
| S. platensis MA7327 FabF  | MTGHLLGGAGGVETVAAILALYHRVAPPTINVDELDPEDID---ADIVRGE   | 390 |
| S. albus J1074 FabF       | MTGHLLGGAGGDIETVATVLAALKHRKAPPTLNVDDELDPATEAGADVVRGE  | 393 |
| S. avermitilis FabF       | MTGHLLGGAGGVESVASVLALYHRVAPPTINVDNLDPEAEAN-ADIVRGE    | 392 |
| S. coelicolor FabF        | MTGHLLGGAGGVESVATVLAALYHRVAPPTINVDNLDPEAEAN-ADIVRGE   | 398 |
| S. griseus FabF           | MTGHLLGGAGGDIETVATVLAALHRRIAPPTINVDDELDEAID---ADIVRGE | 390 |
| E. coli FabF              | MTGHLLGAAGAVESIYSILALRDQAVPPTINLDNPDEGCD---LDFVPHE    | 384 |

|                           |                                   |     |
|---------------------------|-----------------------------------|-----|
| Consensus                 | ARKLP-EGRIAAALNNSFGFGGHNVVLAFRXV  |     |
| S. platensis MA7327 PtmP3 | NRTGQWN---ASLANSFGFGGHNVSIVFTK    | 404 |
| S. platensis MA7339 PtnP3 | NRTGEWN---ASLANSFGFGGHNVSIVFTK    | 404 |
| S. platensis MA7327 FabF  | PRKLPFAEGRIAAALNDSFGFSGHNVVLAFRTV | 421 |
| S. albus J1074 FabF       | ARELE-EGTVAAINNSFGFGGHNVVLAFRTV   | 423 |
| S. avermitilis FabF       | ARKLPVEGRIAAALNDSFGFGGHNVVLAFRTV  | 423 |
| S. coelicolor FabF        | ARKLPVEGRIAAALNDSFGFGGHNVVLAFRSV  | 429 |
| S. griseus FabF           | PRVLE-EGPIAAINNSFGFGGHNVVLAFRSV   | 420 |
| E. coli FabF              | ARQVS--GMEYTLCSNFGFGGCTNGSLIFKKI  | 413 |

**Fig. S3, related to Experimental Procedures.** Disk diffusion assay for PTM and PTN susceptibility of naïve *Streptomyces* spp. *Streptomyces* spp. were assayed for resistance against PTM and PTN. *S. albus* J1027, *S. avermitilis* SUK-A4, *S. lividans* K4-114, *S. coelicolor* CH999, *S. platensis* MA7327, and *S. platensis* MA7339 were challenged with (1) 0  $\mu\text{g}$ , (2) 200  $\mu\text{g}$ , (3) 150  $\mu\text{g}$ , (4) 100  $\mu\text{g}$ , (5) 50  $\mu\text{g}$ , and (6) 25  $\mu\text{g}$  or (A) 5  $\mu\text{g}$ , (B) 10  $\mu\text{g}$ , (C) 20  $\mu\text{g}$ , and (D) 40  $\mu\text{g}$  of PTM or PTN.

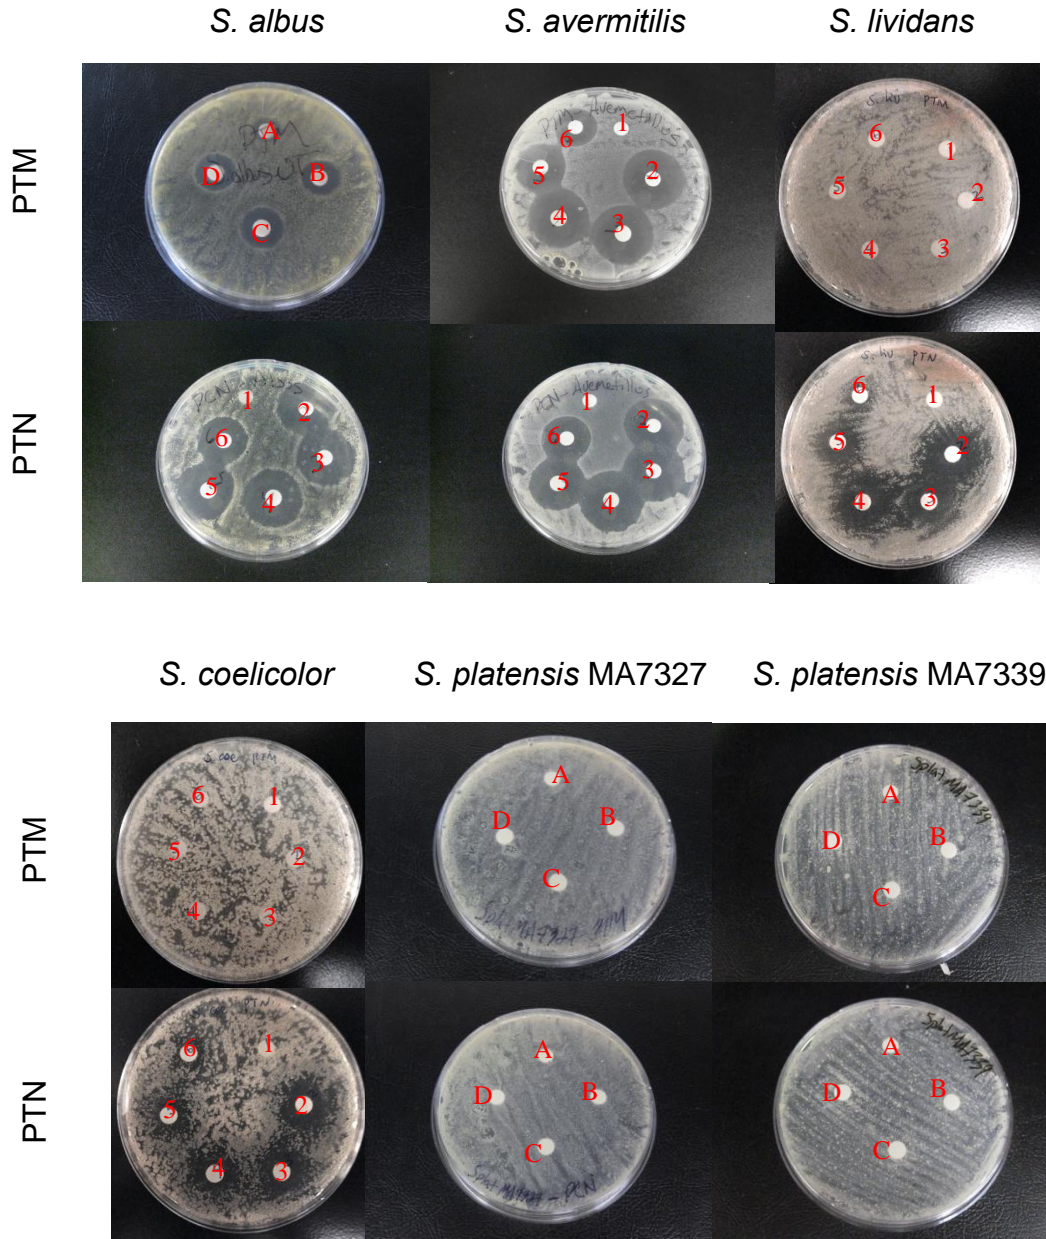

**Fig. S4, related to Table 1.** Minimum inhibitory concentrations (MIC) to PTM and PTN for selected *Streptomyces* species by 96-well plate assay. *S. albus* J1074, *S. platensis* MA7327, *S. platensis* MA7339, *S. albus* SB12011, *S. albus* SB12017, *S. albus* SB12013, *S. albus* SB12014, *S. albus* SB12018, *S. albus* SB12019, and *S. platensis* SB12021 (rows 1-10, respectively) challenged with PTM (panel A) or PTN (panel B). Final concentrations of PTM and PTN were 0, 256, 128, 64, 32, 16, 8, 4, 2, 1, 0.5, and 0.25  $\mu\text{g/mL}$  (columns 1-12, respectively) and 0, 64, 32, 16, 8, 4, 2, 1, 0.5, 0.25, 0.125, and 0.0625  $\mu\text{g/mL}$ , respectively (columns 1-12, respectively). The asterisk denotes a well (i.e., *S. a.* SB12019 at 4) with poor growth; however, it was ignored as the adjacent wells showed no inhibition.

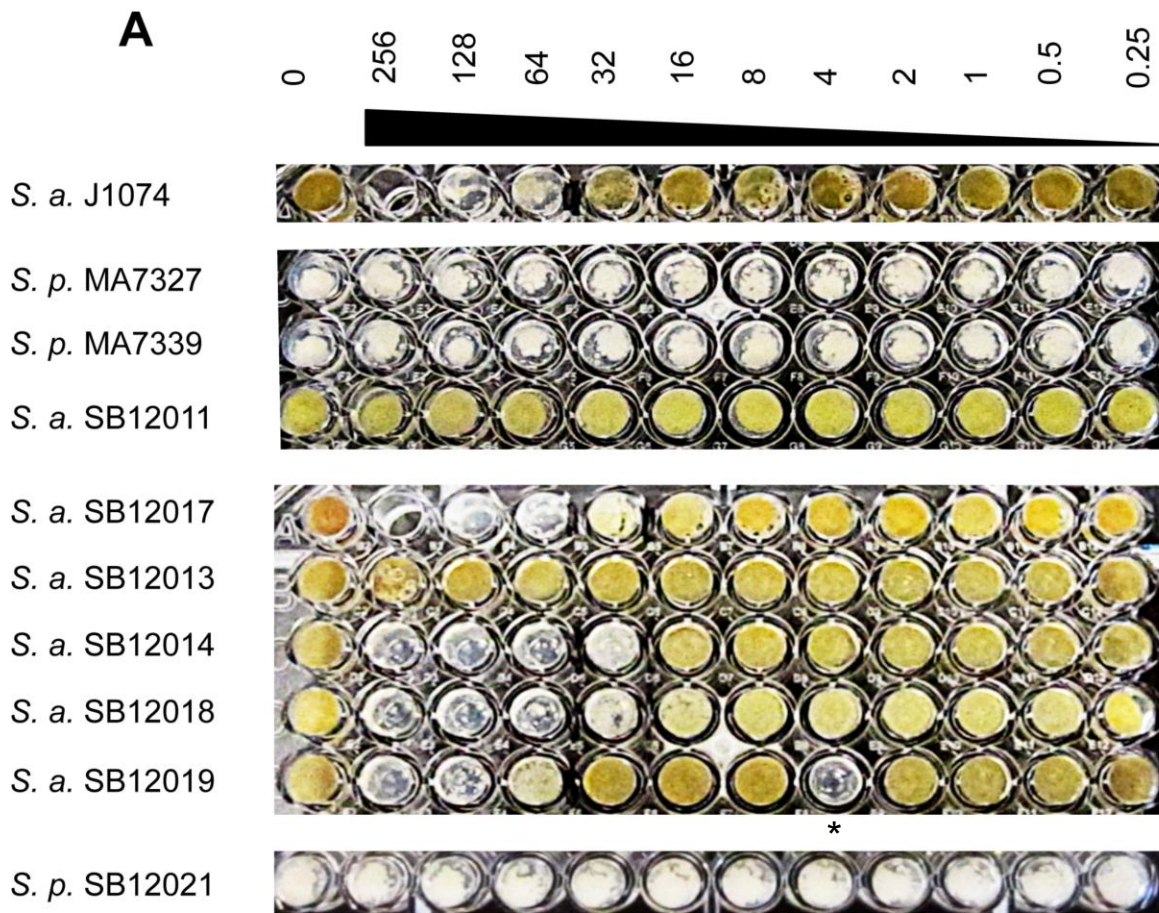



**Fig. S5, related to Experimental Procedures and Table 1.** Construction and Southern analyses of the  $\Delta ptmU4-ptmP4$  mutant *S. platensis* SB12021, the  $\Delta fabF$  mutant *S. platensis* SB12022, the  $\Delta fabH$  mutant of *S. platensis* SB12023. (A) Schematic representation of the deletion of *S. platensis ptmU4-ptmP4* by insertion of an apramycin resistance-oriT cassette (*aac(3)IV+oriT*). (B) PCR verification of WT and double crossover mutant genotypes, using the primers ptmO8for and RLDC2rev. Lane 1, *S. platensis* MA7327; lane 2, *S. platensis* SB12021. (C) Schematic representation of the Southern analysis constructs for *S. platensis* SB12021. (D) Southern blot verification of WT (6795 bp) and double crossover (2502 bp) mutant genotypes. Lanes 1-2, *S. platensis* SB12021; lane 3, *S. platensis* MA7327. (E) Schematic representation of the inactivation of *S. platensis fabF*. (F) PCR verification of WT, single crossover mutant, and double crossover mutant genotypes, using the primers FabF\_IDF and FabF\_IDR. Lane 1, *S. platensis* MA7327; lanes 2 and 5, single crossover mutants; lanes 3 and 4, double crossover mutants, *S. platensis* SB12022 and SB12024; lane 6, pBS12024 positive control. (G) Schematic representation of the inactivation of *S. platensis fabH*. (H) PCR verification of WT, single crossover mutant, and double crossover mutant genotypes, using the primers FabF\_IDF and FabF\_IDR. Lane 1, *S. platensis* MA7327; lane 2, double crossover mutants, *S. platensis* SB12023 (or SB12025); lanes 3-5, single crossover mutants; lane 6, pBS12025 positive control. (I) Schematic representation of the inactivation of *S. platensis fabH*. (J) Schematic representation of the inactivation of *S. platensis fabF*. (K) Southern blot verification of WT (2780 bp) and double crossover mutants of *fabH* (1764 bp) and *fabF* (2283 bp) genotypes. Lanes 1 and 4, *S. platensis* MA7327; lane 2, *S. platensis* SB12023; lane 3, *S. platensis* SB12022.

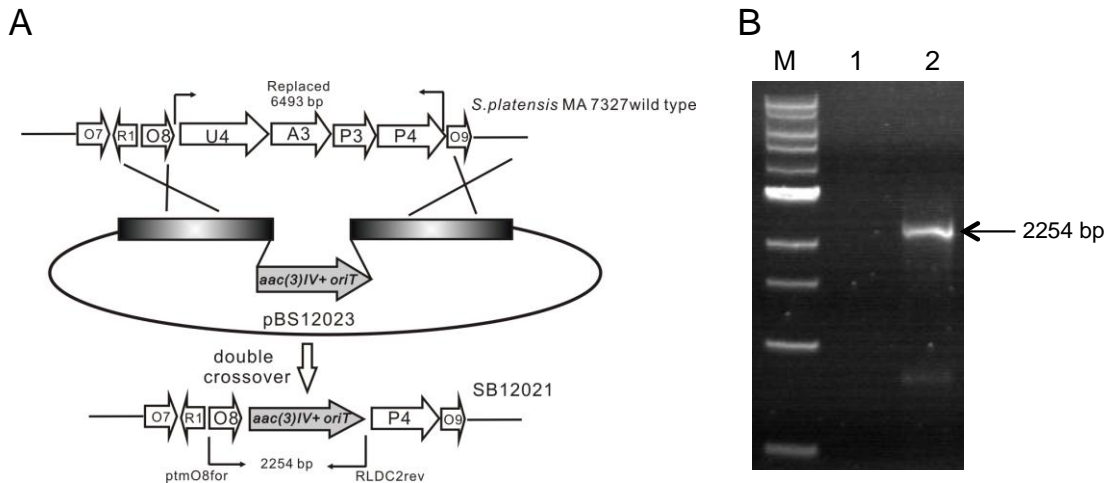

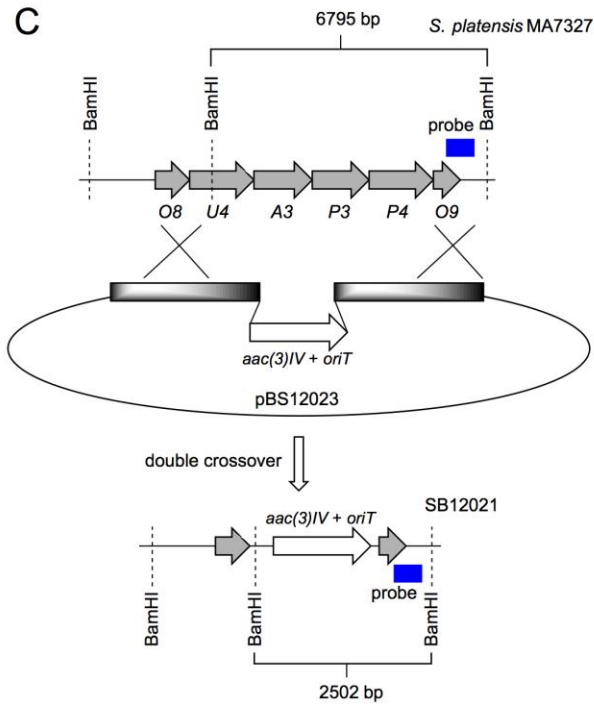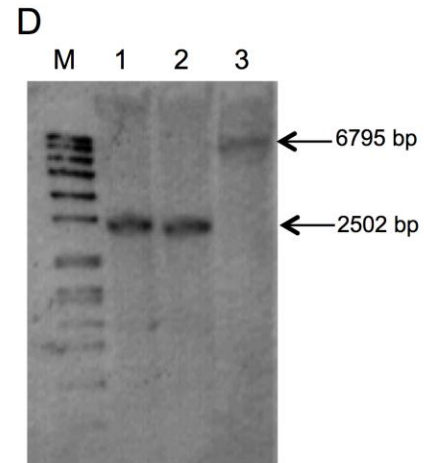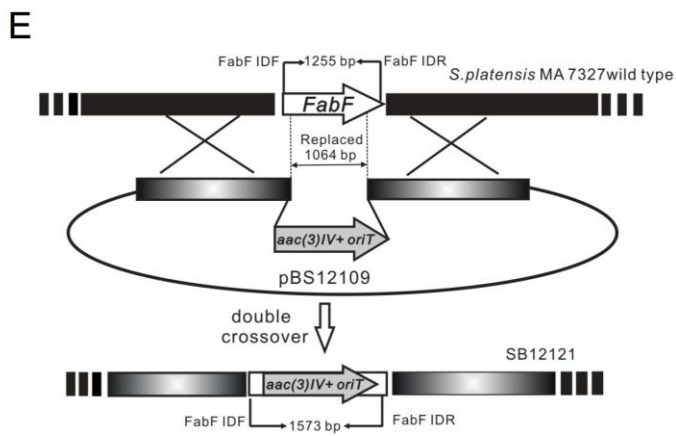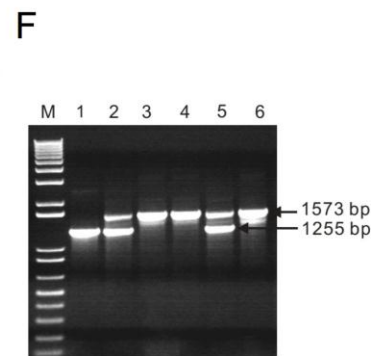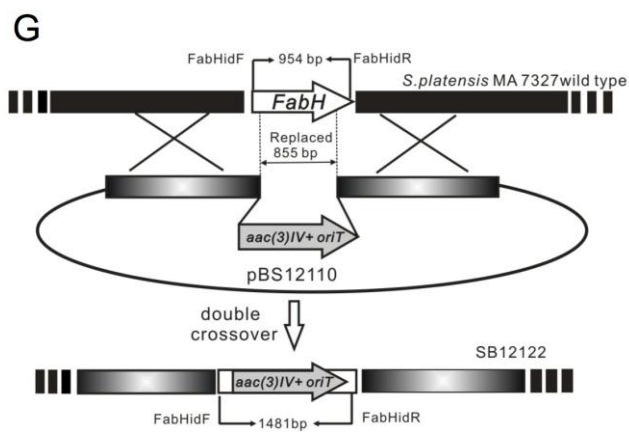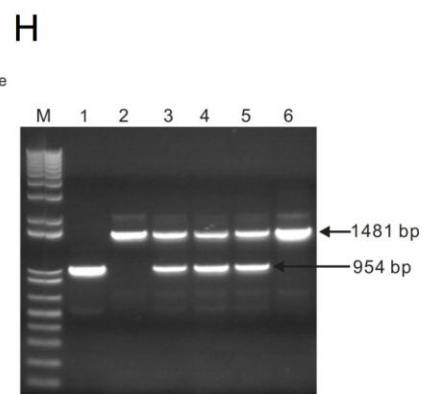



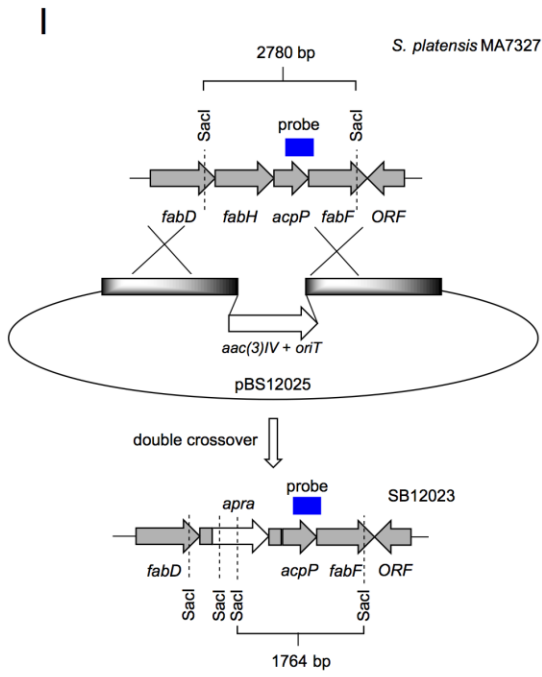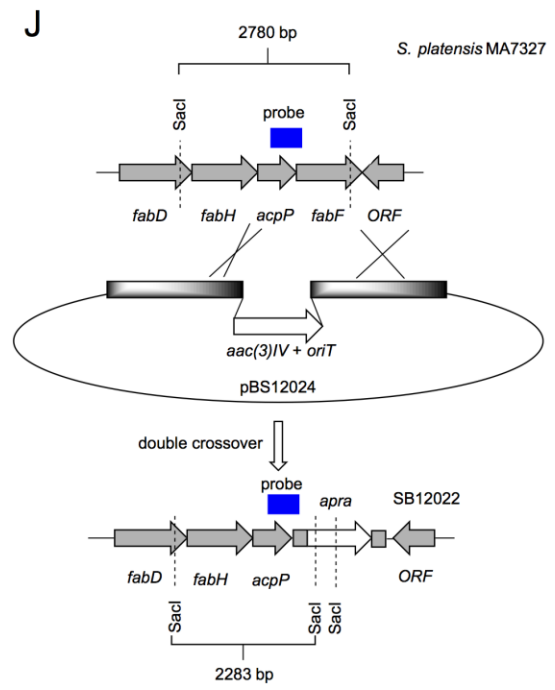

**K**

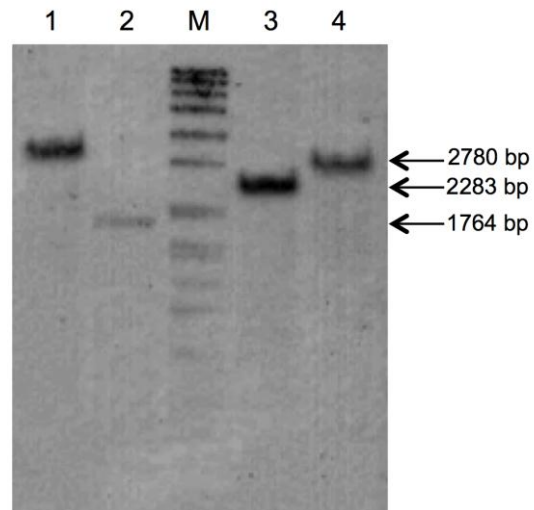

**Table S1, related to Fig. 2A.** Functional analysis of four candidate resistance genes from the *ptm/ptn* gene clusters in *Streptomyces platensis* MA7327 and *Streptomyces platensis* MA7339.

| Gene               | # of AA* | PTM/PTN % Identity | Protein homolog     | % Identity/<br>% Similarity | Proposed function   |
|--------------------|----------|--------------------|---------------------|-----------------------------|---------------------|
| <i>ptmP1/ptnP1</i> | 474      | 96                 | PhIA<br>(AAB48109)  | 23/34 <sup>§</sup>          | Putative resistance |
|                    |          |                    | PhIB<br>(AAB48107)  | 21/36 <sup>¶</sup>          | Unknown             |
| <i>ptmP2/ptnP2</i> | 414      | 99                 | PhIC<br>(AAB48108)  | 22/35                       | Putative resistance |
| <i>ptmP3/ptnP3</i> | 405      | 96                 | TiKASII<br>(1J3N_A) | 46/63                       | Putative resistance |
| <i>ptmP4/ptnP4</i> | 520      | 97                 | Pep<br>(AAG31689)   | 30/48                       | Efflux pump         |

\*AA, amino acids.

<sup>§</sup>Values from alignment of full-length PhIA with residues 1-334 of PtmP1.

<sup>¶</sup>Values from alignment of full-length PhIB with residues 335-474 of PtmP1.

**Table S2, related to Experimental Procedures.** Strains and plasmids used in this study.

| Strain                                 | Genotype, Description                                                                                                                       | Reference/Source                                 |
|----------------------------------------|---------------------------------------------------------------------------------------------------------------------------------------------|--------------------------------------------------|
| <i>E. coli</i> DH5 $\alpha$            | <i>E. coli</i> host for cloning                                                                                                             | Commercial                                       |
| <i>S. platensis</i> MA7327             | Wildtype PTM/PTN producer                                                                                                                   | (Singh, et al., 2006; Wang, et al., 2006)        |
| <i>S. platensis</i> MA7339             | Wildtype PTN producer                                                                                                                       | (Singh, et al., 2007; Wang, et al., 2007)        |
| <i>S. platensis</i> SB12001            | PTM/PTN overproducing strain                                                                                                                | (Smanski, et al., 2009)                          |
| <i>S. platensis</i> SB12002            | PTM/PTN overproducing strain                                                                                                                | (Smanski, et al., 2009)                          |
| <i>E. coli</i> ET12567/pUZ8002         | Methylation-deficient <i>E. coli</i> host for intergeneric conjugation; contains pUZ8002, a nontransmissible <i>oriT</i> mobilizing plasmid | (MacNeil, et al., 1992)                          |
| <i>E. coli</i> BW25113/pIJ790          | <i>E. coli</i> host for PCR targeting                                                                                                       | (Gust, et al., 2003)                             |
| <i>E. coli</i> BW25113/pIJ790/pBS12005 | <i>E. coli</i> host for PCR targeting of the <i>ptm</i> cluster                                                                             | This study                                       |
| <i>S. albus</i> J1074                  | Naïve host for expression constructs                                                                                                        | (Chater and Wilde, 1980)                         |
| <i>S. avermitilis</i> SUK-A4           | Naïve host for susceptibility assay                                                                                                         | (Komatsu, et al., 2010)                          |
| <i>S. lividans</i> K4-114              | Naïve host for susceptibility assay                                                                                                         | (Ziermann and Betlach, 1999)                     |
| <i>S. coelicolor</i> CH999             | Naïve host for susceptibility assay                                                                                                         | (Kieser T, et al., 2000; McDaniel, et al., 1993) |
| <i>S. albus</i> SB12009                | <i>S. albus</i> J1074 harboring pBS12016                                                                                                    | This study                                       |
| <i>S. albus</i> SB12010                | <i>S. albus</i> J1074 harboring pBS12017                                                                                                    | This study                                       |
| <i>S. albus</i> SB12011                | <i>S. albus</i> J1074 harboring pBS12018                                                                                                    | This study                                       |
| <i>S. albus</i> SB12012                | <i>S. albus</i> J1074 harboring pBS12019                                                                                                    | This study                                       |
| <i>S. albus</i> SB12013                | <i>S. albus</i> J1074 harboring pBS12020                                                                                                    | This study                                       |
| <i>S. albus</i> SB12014                | <i>S. albus</i> J1074 harboring pBS12021                                                                                                    | This study                                       |
| <i>S. albus</i> SB12015                | <i>S. albus</i> J1074 harboring pBS12026                                                                                                    | This study                                       |
| <i>S. albus</i> SB12016                | <i>S. albus</i> J1074 harboring pBS12027                                                                                                    | This study                                       |
| <i>S. albus</i> SB12017                | <i>S. albus</i> J1074 harboring pBS12028                                                                                                    | This study                                       |
| <i>S. albus</i> SB12018                | <i>S. albus</i> J1074 harboring pBS12029                                                                                                    | This study                                       |
| <i>S. albus</i> SB12019                | <i>S. albus</i> J1074 harboring pBS12030                                                                                                    | This study                                       |
| <i>S. platensis</i> SB12020            | <i>S. platensis</i> MA7327 harboring pBS12022                                                                                               | This study                                       |
| <i>S. platensis</i> SB12021            | <i>S. platensis</i> MA7327 $\Delta ptmU4-ptmP4::aac(3)IV$                                                                                   | This study                                       |
| <i>S. platensis</i> SB12022            | <i>S. platensis</i> MA7327 $\Delta fabF::aac(3)IV$                                                                                          | This study                                       |
| <i>S. platensis</i> SB12023            | <i>S. platensis</i> MA7327 $\Delta fabH::aac(3)IV$                                                                                          | This study                                       |
| <i>S. platensis</i> SB12024            | <i>S. platensis</i> SB12020 $\Delta fabF::aac(3)IV$                                                                                         | This study                                       |
| <i>S. platensis</i> SB12025            | <i>S. platensis</i> SB12020 $\Delta fabH::aac(3)IV$                                                                                         | This study                                       |
| Plasmid                                | Description                                                                                                                                 | Reference/Source                                 |
| pGEM-T Easy                            | TA cloning vector                                                                                                                           | Promega                                          |
| pCR2.1-TOPO                            | TA cloning vector                                                                                                                           | Invitrogen                                       |

**Table S2** continued.

|          |                                                                                                                                |                         |
|----------|--------------------------------------------------------------------------------------------------------------------------------|-------------------------|
| pIJ773   | Construct containing the apramycin resistance cassette ( <i>aac (3)IV+oriT</i> )                                               | (Gust, et al., 2003)    |
| pBS12005 | Cosmid harboring partial <i>ptm</i> gene cluster                                                                               | (Smanski, et al., 2011) |
| pBS12013 | The ermE* promotor cloned as an 0.3 kb EcoRI/BamHI fragment from pWHM860pro into the same site of pBS9010 (Galm, et al., 2009) | This study              |
| pBS12014 | Cosmid harboring <i>fab</i> cluster from <i>S. platensis</i> MA7327                                                            | This study              |
| pBS12015 | 0.3 kb EcoRI/BamHI fragment from pWHM1250 containing the constitutive ermE* promotor cloned into the same sites of pSET152     | This study              |
| pBS12016 | pSET152ermE* derivative pBS12015 harboring <i>ptmP1</i>                                                                        | This study              |
| pBS12017 | pSET152ermE* derivative pBS12015 harboring <i>ptmP2</i>                                                                        | This study              |
| pBS12018 | pSET152ermE* derivative pBS12015 harboring <i>ptmP3</i>                                                                        | This study              |
| pBS12019 | pSET152ermE* derivative pBS12015 harboring <i>ptmP4</i>                                                                        | This study              |
| pBS12020 | pSET152ermE* derivative pBS12015 harboring <i>S. platensis</i> MA7327 <i>fabF</i>                                              | This study              |
| pBS12021 | pSET152ermE* derivative pBS12015 harboring <i>S. platensis</i> MA7327 <i>fabH</i>                                              | This study              |
| pBS12022 | pSET152ermE* derivative pBS12013 harboring <i>ptmP3</i>                                                                        | This study              |
| pBS12023 | pBS12005 $\Delta ptmU4-ptmP4::aac(IV)3$ , generated by PCR targeting with primers RLDC2for and RLDC2rev                        | This study              |
| pBS12024 | pBS12014 $\Delta fabF::aac(IV)3$ , generated by PCR targeting with primers $\Delta FabF$ -Forward and $\Delta FabF$ -Reverse   | This study              |
| pBS12025 | pBS12014 $\Delta fabH::aac(IV)3$ , generated by PCR targeting with primers $\Delta FabH$ -Forward and $\Delta FabH$ -Reverse   | This study              |
| pBS12026 | pSET152ermE* derivative pBS12015 harboring <i>ptmP3(C162A)</i>                                                                 | This study              |
| pBS12027 | pSET152ermE* derivative pBS12015 harboring <i>ptmP3(C162Q)</i>                                                                 | This study              |
| pBS12028 | pSET152ermE* derivative pBS12015 harboring <i>ptmP3(C162L)</i>                                                                 | This study              |
| pBS12029 | pSET152ermE* derivative pBS12015 harboring <i>S. albus</i> J1074 <i>fabF</i>                                                   | This study              |
| pBS12030 | pSET152ermE* derivative pBS12015 harboring <i>S. albus</i> J1074 <i>fabH</i>                                                   | This study              |

**Table S3, related to Experimental Procedures.** Primers used in this study.

| Primer                | Nucleotide Sequence (5'-3')                                        | Function                                                                         |
|-----------------------|--------------------------------------------------------------------|----------------------------------------------------------------------------------|
| PtmP1For              | GACCTCGACGTCGCTGAC                                                 | Amplification of <i>ptmP1</i>                                                    |
| PtmP1Rev              | TGGTTCCGTGCGCAGTAC                                                 | Amplification of <i>ptmP1</i>                                                    |
| PtmP2For              | CGTGGTGTGATGACCCGTC                                                | Amplification of <i>ptmP2</i>                                                    |
| PtmP2Rev              | GCCAGTTCGACGGCCATG                                                 | Amplification of <i>ptmP2</i>                                                    |
| PtmP3For              | TGTGGAAGGGACACAACCTACC                                             | Amplification of <i>ptmP3</i>                                                    |
| PtmP3Rev              | GTGGTCACTTGGTGAACACCAGG                                            | Amplification of <i>ptmP3</i>                                                    |
| PtmP4For              | TGTTACCAAGTGACCACGGC                                               | Amplification of <i>ptmP4</i>                                                    |
| PtmP4Rev              | CGTCATCACTCACTCCAGGATG                                             | Amplification of <i>ptmP4</i>                                                    |
| PtmP3C162A<br>For     | GCCCGTCAGCGCCGCGCTCCGGTGCCG                                        | Site-directed mutagenesis<br>of <i>ptmP3</i>                                     |
| PtmP3C162A<br>Rev     | CGGCACCGGACGCGGCGGCGCTGACGGGC                                      | Site-directed mutagenesis<br>of <i>ptmP3</i>                                     |
| PtmP3C162Q<br>For     | GCCCGTCAGCGCCAGGCGTCCGGTGCCG                                       | Site-directed mutagenesis<br>of <i>ptmP3</i>                                     |
| PtmP3C162Q<br>Rev     | CGGCACCGGACGCGCTGGGCGCTGACGGGC                                     | Site-directed mutagenesis<br>of <i>ptmP3</i>                                     |
| SeqC162mut<br>Up      | GACGACATCTTCGAGGAGTCCG                                             | Sequencing of PtmP3<br>C162 mutations                                            |
| SeqC162mut<br>Down    | CGGACTCCTCGAAGATGTCTGC                                             | Sequencing of PtmP3<br>C162 mutations                                            |
| RLDC2for              | ACACCAGCCGTACTIONACGCGGATCGGAGGGCC<br>GAGTCGTGATTCCGGGGATCCGTCGACC | Amplification of <i>ptmU4-<br/>ptmP4</i> disruption cassette                     |
| RLDC2rev              | CTACTTGCCGGGCTGCCGGGTACGGACGAGC<br>AGTCCGGCTGTAGGCTGGAGCTGCTTC     | Amplification of <i>ptmU4-<br/>ptmP4</i> disruption cassette                     |
| ptmO8for              | AAAACCTCTATTTCCAGTCGGTAGCGTTAAAT<br>CAGTTAACTAAG                   | Confirmation of $\Delta$ <i>ptmU4-<br/>ptmP4</i> in <i>S. platensis</i>          |
| U4-P4SouthF           | GTCGAGGCCATCTTCTACGA                                               | Probe for Southern<br>analysis of $\Delta$ <i>U4-P4</i>                          |
| U4-P4SouthR           | GAACATCCAGCGGTTCTCC                                                | Probe for Southern<br>analysis of $\Delta$ <i>U4-P4</i>                          |
| UpstreamFab<br>H(2)   | TGGGACCTGTGCATGGAGAC                                               | Amplification/sequencing<br>of<br><i>Streptomyces</i> /sequencing<br><i>fabH</i> |
| Downstream<br>FabH(1) | GGTCGTCGGTGAAGGACTTGTC                                             | Amplification/sequencing<br>of <i>Streptomyces fabH</i>                          |
| Downstream<br>FabH(2) | TCGACCATGGACAGCGAGTCG                                              | Amplification/sequencing<br>of <i>Streptomyces fabH</i>                          |
| UpstreamFab<br>F(1)   | GGACAAGTCCTTCACCGACGAC                                             | Amplification/sequencing<br>of <i>Streptomyces fabF</i>                          |
| UpstreamFab<br>F(2)   | GCTGTCCATGGTCGAGGTCCG                                              | Amplification/sequencing<br>of <i>Streptomyces fabF</i>                          |
| Downstream<br>FabF(1) | TCCGCTGGCTGCACCAGG                                                 | Amplification/sequencing<br>of <i>Streptomyces fabF</i>                          |
| Downstream<br>FabF(2) | ACGACGAACTGGAGCCCTTCC                                              | Amplification/sequencing<br>of <i>Streptomyces fabF</i>                          |

**Table S3** continued.

| Primer                | Nucleotide Sequence (5'-3')                                     | Function                                                    |
|-----------------------|-----------------------------------------------------------------|-------------------------------------------------------------|
| FabFinFor             | GCGGCCAGTACGACGTGCTC                                            | Sequencing of <i>Streptomyces fabF</i>                      |
| FabFinRev             | AGCCGTCTCAAGCTCGTCGTC                                           | Sequencing of <i>Streptomyces fabF</i>                      |
| $\Delta$ FabH-Forward | GGCGGCTACCGCCCGACCCGGGTCGTGCCC<br>AACGAGGAGATTCCGGGGATCCGTCGACC | Amplification of <i>fabH</i> disruption cassette            |
| $\Delta$ FabH-Reverse | CAACAGTCGCTCCATGGCGAGCGGAATGGAG<br>GCGGCCGATGTAGGCTGGAGCTGCTTC  | Amplification of <i>fabH</i> disruption cassette            |
| $\Delta$ FabF-Forward | ACACCGCTGGGTGGCGACAGCGCTTCGTCCT<br>GGGAGGCCATTCCGGGGATCCGTCGACC | Amplification of <i>fabF</i> disruption cassette            |
| $\Delta$ FabF-Reverse | CTCGGCGGGCAGCTTGCGGGGCTCGCCGCG<br>GACGATGTCTGTAGGCTGGAGCTGCTTC  | Amplification of <i>fabF</i> disruption cassette            |
| FabHscreen For        | TCCACCGTTTTCGCACTTCA                                            | Isolation of cosmids containing <i>S. platensis fabH</i>    |
| FabHscreen Rev        | GGCCGTTGGGCATCAGCAT                                             | Isolation of cosmids containing <i>S. platensis fabH</i>    |
| FabFscreen For        | ATCGCACCGTGGTCGTCAC                                             | Isolation of cosmids containing <i>S. platensis fabF</i>    |
| FabFscreen Rev        | GGCCGTTGGGCATCAGCAT                                             | Isolation of cosmids containing <i>S. platensis fabF</i>    |
| FabH_IDF              | GACCTCGAAGGTCAAGCCC                                             | Confirmation of $\Delta$ <i>fabH</i> in <i>S. platensis</i> |
| FabH_IDR              | GTCGCCAACAGTCGCTCCA                                             | Confirmation of $\Delta$ <i>fabH</i> in <i>S. platensis</i> |
| FabF_IDF              | AACGCGACCAATCGCACCG                                             | Confirmation of $\Delta$ <i>fabF</i> in <i>S. platensis</i> |
| FabF_IDR              | TCCGGAAGGCCAGCACCAC                                             | Confirmation of $\Delta$ <i>fabF</i> in <i>S. platensis</i> |
| fabFH_South F         | CGGATCTTCACCGCAAGTAA                                            | Probe for Southern analysis of $\Delta$ <i>fabF/H</i>       |
| fabFH_South R         | GTTACGCGGAATTCTTACTCCA                                          | Probe for Southern analysis of $\Delta$ <i>fabF/H</i>       |

## References

- Chater, K.F., and Wilde, L.C. (1980). Streptomyces albus G mutants defective in the SalGI restriction-modification system. *J. Gen. Microbiol.* *116*, 323-334.
- Galm, U., Wendt-Pienkowski, E., Wang, L., George Nicholas, P., Oh, T.-J., Yi, F., Tao, M., Coughlin Jane, M., and Shen, B. (2009). The biosynthetic gene cluster of zorbamycin, a member of the bleomycin family of antitumor antibiotics, from Streptomyces flavoviridis ATCC 21892. *Mol. Biosyst.* *5*, 77-90.
- Gust, B., Challis, G.L., Fowler, K., Kieser, T., and Chater, K.F. (2003). PCR-targeted Streptomyces gene replacement identifies a protein domain needed for biosynthesis of the sesquiterpene soil odor geosmin. *Proc. Natl. Acad. Sci. USA* *100*, 1541-1546.
- Kieser T, Bibb MJ, Chater, K.F., Butter MJ, and Hopwood, D. (2000). Practical Streptomyces genetics: a laboratory manual. (Norwich: John Innes Foundation, Norwich, UK).
- Komatsu, M., Uchiyama, T., Omura, S., Cane, D.E., and Ikeda, H. (2010). Genome-minimized Streptomyces host for the heterologous expression of secondary metabolism. *Proc. Natl. Acad. Sci. USA* *107*, 2646-2651.
- MacNeil, D.J., Gewain, K.M., Ruby, C.L., Dezeny, G., Gibbons, P.H., and MacNeil, T. (1992). Analysis of Streptomyces avermitilis genes required for avermectin biosynthesis utilizing a novel integration vector. *Gene* *111*, 61-68.
- McDaniel, R., Ebert-Khosla, S., Hopwood, D.A., and Khosla, C. (1993). Engineered biosynthesis of novel polyketides. *Science* *262*, 1546-1550.
- Singh, S.B., Jayasuriya, H., Ondeyka, J.G., Herath, K.B., Zhang, C., Zink, D.L., Tsou, N.N., Ball, R.G., Basilio, A., Genilloud, O., et al. (2006). Isolation, structure, and absolute stereochemistry of platensimycin, a broad spectrum antibiotic discovered using an antisense differential sensitivity strategy. *J. Am. Chem. Soc.* *128*, 11916-11920.
- Singh, S.B., Phillips, J.W., and Wang, J. (2007). Highly sensitive target-based whole-cell antibacterial discovery strategy by antisense RNA silencing. *Curr. Opin. Drug Discov. Devel.* *10*, 160-166.
- Smanski, M.J., Peterson, R.M., Rajski, S.R., and Shen, B. (2009). Engineered Streptomyces platensis strains that overproduce antibiotics platensimycin and platencin. *Antimicrob. Agents Chemother.* *53*, 1299-1304.
- Smanski, M.J., Yu, Z., Casper, J., Lin, S., Peterson, R.M., Chen, Y., Wendt-Pienkowski, E., Rajski, S.R., and Shen, B. (2011). Dedicated *ent*-kaurene and *ent*-atiserene synthases for platensimycin and platencin biosynthesis. *Proc. Natl. Acad. Sci. USA* *108*, 13498-13503.
- Wang, J., Kodali, S., Lee, S.H., Galgoci, A., Painter, R., Dorso, K., Racine, F., Motyl, M., Hernandez, L., Tinney, E., et al. (2007). Discovery of platencin, a dual FabF and FabH inhibitor with in vivo antibiotic properties. *Proc. Natl. Acad. Sci. USA* *104*, 7612-7616.

Wang, J., Soisson, S.M., Young, K., Shoop, W., Kodali, S., Galgoci, A., Painter, R., Parthasarathy, G., Tang, Y.S., Cummings, R., et al. (2006). Platensimycin is a selective FabF inhibitor with potent antibiotic properties. *Nature* *441*, 358-361.

Ziermann, R., and Betlach, M.C. (1999). Recombinant polyketide synthesis in *Streptomyces*: engineering of improved host strains. *BioTechniques* *26*, 106-110.
